# Supplementary material
Source: PubMed Central journal article supplement (PMC3738079)
Supplement: 10.3163.1536-5050.101.3.008.sg001.pdf [file 10.3163.1536-5050.101.3.008.sg001.pdf]

**Making the Critical Appraisal for Summaries of Evidence (CASE) for evidence-based medicine (EBM):  
critical appraisal of summaries of evidence**

**Margaret J. Foster, MLIS, MPH, AHIP; Suzanne Shurtz, MLIS, AHIP**

**APPENDIX**

**Revised Critical Appraisal for Summaries of Evidence (CASE) worksheet**

| <u>Questions (guiding questions)</u>                                                                                                                                                                                                                                                | <u>Evaluation</u>               |
|-------------------------------------------------------------------------------------------------------------------------------------------------------------------------------------------------------------------------------------------------------------------------------------|---------------------------------|
| <b>Summary topic</b>                                                                                                                                                                                                                                                                |                                 |
| 1. Is the summary specific in scope and application?<br>– Are clinical questions covered by the summary specifically described?<br>– Are patients the summary applies to described?                                                                                                 | Yes Not completely No<br>Notes: |
| <b>Summary methods</b>                                                                                                                                                                                                                                                              |                                 |
| 2. Is the authorship of the summary transparent?<br>– Are individual authors listed?<br>– Are credentials of author(s) listed?<br>– Are affiliations of author(s) listed<br>– Is the process to become an author described?                                                         | Yes Not completely No<br>Notes: |
| 3. Are the reviewer(s)/editor(s) of the summary transparent?<br>– Are the summaries edited/reviewed?<br>– Are individual reviewers listed?<br>– Are credentials of reviewer(s) listed?<br>– Are affiliations of reviewer(s) listed?<br>– Is the process to be a reviewer described? | Yes Not completely No<br>Notes: |
| 4. Are the search methods transparent and comprehensive?<br>– Are the inclusion criteria for selected studies clearly described?<br>– Are the sources of the search provided?<br>– Is the search thorough enough to find all the relevant studies?<br>– Are search terms listed?    | Yes Not completely No           |
| 5. Is the evidence graded and is the system transparent and translatable<br>– Is the system clearly described?<br>– Is the system based on a standard?<br>– Is there a grade for each recommendation and/or cited study?<br>– Are the grade labels easy to interpret?               | Yes Not completely No           |
| <b>Summary content</b>                                                                                                                                                                                                                                                              |                                 |
| 6. Are the recommendations clear?<br>– Are recommendations clearly described?<br>– Are multiple options for treatment provided?                                                                                                                                                     | Yes Not completely No           |

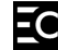

7. Are the recommendations appropriately cited? Yes Not completely No  
– Are citations provided?  
– Is there an explicit link between the summary text and supporting evidence?
8. Are the recommendations current? Yes No  
– Has the summary been updated within the last 2 years? Notes:
9. Is the summary free of possible bias? Yes Not completely No  
– Is there a conflict of interest between the recommendations of the summary and the sponsor for any author or reviewer? Notes:
- Summary application**
10. Can this summary be applied to your patient(s)? Yes Not completely No  
– Does the evidence cover your patient(s) or a similar population? Notes:  
– Does the evidence cover your setting or similar setting?  
– Can you translate the recommendations treatment plan for your patient(s)?
